# Supplementary material for: Alcohol Consumption and Cancer Risk: Two Sample Mendelian Randomization
Source: Preprints.org preprint supplement (doi:10.20944/preprints202407.2438.v1), 2024-07-30
Supplement: Supplementary file 1 [file supplementary]

## Sheet: Sheet1
Supplementary Material 2. Two sample Mendelian Randomization between alcohol intake frequency and cancer sites (ukb-a-25)
Cancer site	ID	Case / control	NSNP	Inverse Variance Weighted			Weighted median		MR-Egger estimate		MR-PRESSO
				OR (95% CI)		P value	OR (95% CI)	p value	OR (95% CI)	p value	OR (95% CI)	p value
Stomach	finn-b-C3_STOMACH_EXALLC	633 / 174,006	41	0.48 (0.23-1.00)		0.04858	0.537 (0.19-1.51)	0.238278	0.69 (0.10-5.07)	0.715244	NA	NA
Liver	finn-b-C3_LIVER_INTRAHEPATIC_BILE_DUCTS_EXALLC	304 / 174,006	41	0.93 (0.33-2.62)		0.8942	0.61 (0.13-2.76)	0.521239	0.37 (0.02-6.65)	0.502177	NA	NA
Lung	ieu-b-4955	2,671 / 372,016	41	1.00 (1.00-1.00)		0.6834	1.00 (1.00-1.00)	0.384493	1.00 (0.99-1.00)	0.613336	NA	NA
Colon	finn-b-C3_COLON_EXALLC	1,803 / 174,006	41	0.77 (0.50-1.18)		0.2305	0.69 (0.37-1.28)	0.239754	0.37 (0.11-1.23)	0.1144	NA	NA
Thyroid	finn-b-C3_THYROID_GLAND_EXALLC	989 / 174,006	41	1.12 (0.57-218)		0.7411	0.92 (0.40-2.1311)	0.841597	1.22 (0.19-7.76)	0.833784	NA	NA
Cervix	finn-b-C3_CERVIX_UTERI_EXALLC	1,648 / 99,321	41	0.99 (0.54-1.80)		0.9665	0.94 (0.48-1.8614)	0.861929	1.00 (0.19-5.25)	0.833784	0.82 (0.49-1.37)	0.451672
Breast	finn-b-C3_BREAST_EXALLC	8,401 / 99,321	42	0.98 (0.81-1.18)		0.8371	0.92 (0.65-1.31)	0.656239	0.96 (0.44-2.14)	0.9293	0.98 (0.78-1.2)	0.8292
Prostate	finn-b-C3_PROSTATE_EXALLC	6,311 / 74,685	41	0.99 (0.71-1.38)		0.9552	1.34 (0.90-2.00)	0.149768	1.15 (0.46-2.83)	0.769	0.96 (0.73-1.27)	0.769825
Colorectal	finn-b-C3_COLORECTAL_EXALLC	3,022 / 215,770	41	0.78 (0.55-1.10)		0.1541	0.82 (0.50-1.35)	0.433243	0.53 (0.21-1.34)	0.18467	NA	NA
Bladder	finn-b-C3_BLADDER_EXALLC	1,115 / 174,006	41	1.16 (0.67-2.01)		0.6015	1.563 (0.72-3.42)	0.263671	1.34 (0.30-6.05)	0.708237	NA	NA
Larynx	finn-b-C3_LARYNX_EXALLC	180 / 174,005	41	0.59 (0.15-2.27)		0.441	0.46 (0.06-3.26)	0.436193	0.17 (0.08-0.35)	0.36194	NA	NA
Lip-Oral-Pharynx	finn-b-C3_LIP_ORAL_PHARYNX_EXALLC	126 / 174,006	41	1.11 (0.19-6.50)		0.90508	1.12 (0.10-12.47)	0.926316	0.88 (0.01-129.19)	0.960802	NA	NA
Oral cavity	ieu-b-94	1,223 / 2,928	39	0.61 (0.29-1.27)		0.1879	0.40 (0.16-1.03)	0.0582932	0.17 (0.01-2.56)	0.208067	NA	NA
Brain	finn-b-C3_BRAIN_EXALLC	464 / 174,006	41	1.00 (1.00-1.00)		0.5317	0.78 (0.23-2.64)	0.691186	0.80 (0.08-8.34)	0.849948	NA	NA
Biliary tract	finn-b-C3_BILIARY_TRACT_EXALLC	109 / 174,006	41	1.44 (0.26-8.14)		0.6776	3.01 (0.23-39.89)	0.402496	14.43 (0.12-1682.05)	0.278311	NA	NA
Oesophagus	finn-b-C3_OESOPHAGUS_EXALLC	232/218560	41	2.58 (0.74-9.00)		0.138	1.52 (0.26-8.96)	0.645875	0.12 (0.00-3.68)	0.234233	NA	NA
