# Supplementary material for: Alcohol Consumption and Cancer Risk: Two Sample Mendelian Randomization
Source: Preprints.org preprint supplement (doi:10.20944/preprints202407.2438.v1), 2024-07-30
Supplement: Supplementary file 2 [file epidemiologia-2936613 - supplementary 1.xlsx]

## Sheet: Sheet1
Supplementary Material 1. Two sample Mendelian Randomization between alcohol consumption and cancer sites (id:ieu-b-4834)
Cancer site	ID	Case / control	NSNP	Inverse Variance Weighted			Weighted median		MR-Egger estimate		MR-PRESSO
						P value	OR (95% CI)	p value	OR (95% CI)	p value	OR (95% CI)	p value
Stomach	finn-b-C3_STOMACH_EXALLC	633 / 174,006	6	1.06 (0.57-1.96)		0.863	1.51 (0.72-3.15)	0.272803	0.15 (0.00-4.54)	0.323458	NA	NA
Liver	finn-b-C3_LIVER_INTRAHEPATIC_BILE_DUCTS_EXALLC	304 / 174,006	6	1.14 (0.47-2.78)		0.77	1.48 (0.54-4.11)	0.448153	45.81 (0.33-6333.41)	0.188782	NA	NA
Lung	ieu-b-4955	2,671 / 372,016	6	1.00 (1.00-1.00)		0.44	1.00 (1.00-1.00)	0.165063	0.99 (0.98-1.00)	0.111852	NA	NA
Colon	finn-b-C3_COLON_EXALLC	1,803 / 174,006	6	1.13 (0.78-1.65)		0.5098	1.4 (0.93-2.09)	0.104168	0.95 (0.12-7.53)	0.959892	NA	NA
Thyroid	finn-b-C3_THYROID_GLAND_EXALLC	989 / 174,006	6	1.18 (0.71-1.95)		0.5616	1.28 (0.74-2.20)	0.379206	2.11 (0.13-35.09 )	0.623858	NA	NA
Cervix	finn-b-C3_CERVIX_UTERI_EXALLC	1,648 / 99,321	6	0.98 (0.62-1.54)		0.926	0.91 (0.58-1.41)	0.666705	0.16 (0.02-1.44)	0.164211	NA	NA
Breast	finn-b-C3_BREAST_EXALLC	15,748 / 18,084	6	0.93 (0.81-1.06)		0.266	0.82 (0.67-1.01)	0.0604047	0.56 (0.19-1.64)	0.335211	0.98 (0.78-1.23)	0.8292
Prostate	finn-b-C3_PROSTATE_EXALLC	6,311 / 74,685	6	1.09 (0.81-1.47)		0.563	1.10 (0.84-1.43)	0.519833	1.12 (0.20-6.19)	0.902284	NA	NA
Colorectal	finn-b-C3_COLORECTAL_EXALLC	3,022 / 215,770	6	0.94 (0.70-1.26)		0.6844	0.82 (0.67-1.01)	0.830382	0.89 (0.16-5.00)	0.901732	NA	NA
Bladder	finn-b-C3_BLADDER_EXALLC	1,115 / 174,006	6	1.29 (0.80-2.07)		0.2906	1.31 (0.79-2.18)	0.294048	1.28 (0.09-17.61)	0.862041	NA	NA
Larynx	finn-b-C3_LARYNX_EXALLC	180 / 174,005	6	2.12 (0.46-9.82)		0.3357	2.60 (0.74-9.10)	0.133981	0.62 (0.00-2740.41)	0.914575	NA	NA
Lip-Oral-Pharynx	finn-b-C3_LIP_ORAL_PHARYNX_EXALLC	126 / 174,006	6	1.16 (0.29-4.61)		0.8317	1.51 (0.34-6.66)	0.587567	1.39 (0.00-2905.67)	0.935431	NA	NA
Oral cavity	ieu-b-94	1,223 / 2,928	3	2.32 (0.91-5.92)		0.07685	1.58 (0.54-4.62)	0.401728	292.84 (0.55-155947.04)	0.326885	NA	NA
Brain	finn-b-C3_BRAIN_EXALLC	464 / 174,006	6	0.98 (0.46-2.09)		0.9604	0.71 (0.31-1.63)	0.414917	0.03 (0.00-2.02)	0.166352	NA	NA
Biliary tract	finn-b-C3_BILIARY_TRACT_EXALLC	109 / 174,006	6	0.15 (0.01-3.72)		0.3022	1.38 (0.22-8.54)	0.726351	0.00 (0.00-11.56)	0.226528	NA	NA
Oesophagus	finn-b-C3_OESOPHAGUS_EXALLC	232/218560	6	1.61 (0.58-4.48)		0.359	1.49 (0.44-5.02)	0.517449	0.15 (0.00-45.16)	0.54592	NA	NA
